# Supplementary material for: Predicting Patient No-show Behavior: a Study in a Bariatric Clinic
Source: Springer Nature journal article supplement (doi:10.1007/s11695-018-3480-9), 2018-09-12
Supplement: MOESM2 [file 16117476]

**Supplementary Material II**

**Supplementary material.** Univariate analysis by specialty.

| **Independent Variables** | **Bariatric Surgeon** | **Psychologist** | **Nutritionist** | **General Practitioner** | **Endocrinologist** |
| --- | --- | --- | --- | --- | --- |
| OR (p-value) | OR (p-value) | OR (p-value) | OR (p-value) | OR (p-value) |
| **Age group** |  |  |  |  |  |
| 14 to 29 years | Ref | Ref | Ref | Ref | Ref |
| 30 to 44 years | 1.22* | 1.11 | 1.36** | 1.06 | 1.26 |
| 45 to 59 years | 0.82 | 0.92 | 1.19 | 0.84 | 0.88 |
| More than 59 years | 1.31 | 0.78 | 1.10 | 1.30 | 0.73 |
| **Gender** |  |  |  |  |  |
| Female | Ref | Ref | Ref | Ref | Ref |
| Male | 1.12 | 0.89 | 0.77** | 0.76* | 1.00 |
| **Form of payment** |  |  |  |  |  |
| Health insurance | Ref | Ref | Ref | na | Ref |
| Self-pay | 1.52** | 0.85* | 1.24 | na | 0.83* |
| **Lead time** |  |  |  |  |  |
| 0 to 7 days | Ref | Ref | Ref | Ref | Ref |
| 8 to 15 days | 1.59**** | 1.44*** | 1.35** | 1.36* | 1.54*** |
| 16 to 29 days | 1.87**** | 1.39*** | 1.30* | 1.73*** | 1.27* |
| More than 29 days | 1.66*** | 0.98 | 1.56*** | 1.47 | 1.42* |
| **Appointment time** |  |  |  |  |  |
| 08:30am to 10:30am | Ref | Ref | Ref | Ref | Ref |
| 10:31am to 12:30pm | 0.97 | 1.32* | 1.31* | 0.93 | 1.13 |
| 12:31pm to 2:30pm | 1.47*** | 0.92 | 1.10 | 0.55*** | 0.87 |
| 2:31pm to 4:30pm | 1.25 | 0.95 | 0.99 | 0.58*** | 0.72* |
| 4:31pm to 6:30pm | 3.83**** | 1.69*** | 1.13 | 0.26* | 0.77 |
| **Prior no-show history** |  |  |  |  |  |
| 0 to 10% | Ref | Ref | Ref | Ref | Ref |
| 10 to 30% | 1.38*** | 1.62*** | 1.49*** | 1.09 | 1.54*** |
| 30 to 50% | 1.27 | 4.29**** | 2.92**** | 2.31*** | 1.82*** |
| More than 50% | 3.13**** | 11.38**** | 6.94**** | 2.39**** | 4.29**** |
| **Number of previous appointments** |  |  |  |  |  |
| 1 or 2 times | Ref | Ref | Ref | Ref | Ref |
| 3 to 9 times | 1.17* | 0.43**** | 0.73** | 0.80 | 0.85 |
| More than 9 times | 0.51**** | 0.75* | 0.91 | 0.65*** | 1.10 |
| **Type of appointment** |  |  |  |  |  |
| Pre-Surgery | Ref | Ref | Ref | Ref | Ref |
| Post-Surgery | 0.95 | 1.55*** | 1.21* | 1.29* | 1.32** |
| **Appointment weekday** |  |  |  |  |  |
| Monday | Ref | Ref | Ref | Ref | Ref |
| Tuesday | 0.84 | 0.79* | 0.72** | 2.08**** | 0.93 |
| Wednesday | 1.02 | 0.60*** | 1.46** | 0.69* | 0.96 |
| Thursday | 0.67** | 1.05 | 1.16 | 1.96*** | 1.23 |
| Friday | 0.74* | 0.57*** | 0.50**** | 0.31* | 1.51 |
| **Distance** |  |  |  |  |  |
| Less than 10km | Ref | Ref | Ref | Ref | Ref |
| 10 to 20km | 0.63*** | 0.80 | 0.77* | 0.90 | 0.80 |
| 20 to 50km | 1.20* | 1.12 | 1.03 | 1.20 | 0.94 |
| More than 50km | 1.36* | 0.86 | 0.87 | 1.28 | 0.64* |
| **Appointment Month** |  |  |  |  |  |
| Dec-Jan-Feb | Ref | Ref | Ref | Ref | Ref |
| Mar-Apr-May | 1.43*** | 1.11 | 0.83 | 0.86 | 0.91 |
| Jun-Jul-Aug | 1.23 | 1.43*** | 1.58*** | 0.95 | 1.04 |
| Sep-Oct-Nov | 1.69*** | 1.55*** | 1.81**** | 1.17 | 1.34* |
| Legend: ****p-value<0.001; ***p-value<0.05; **p-value<0.1; *p-value<0.25; na = not applicable; Ref. = Reference level; OR = Odds Ratio. | | | | | |
|

**Supplementary material.** Multiple analysis by specialty.

| **Independent Variables** | **Multiple** | | | |  | **Reduced Multiple** | | | |  |
| --- | --- | --- | --- | --- | --- | --- | --- | --- | --- | --- |
| **Bariatric Surgeon** | **Psychologist** | **Nutritionist** | **General Practitioner** | **Endocrinologist** | **Bariatric Surgeon** | **Psychologist** | **Nutritionist** | **General Practitioner** | **Endocrinologist** |
| OR (p-value) | OR (p-value) | OR (p-value) | OR (p-value) | OR (p-value) | OR (p-value) | OR (p-value) | OR (p-value) | OR (p-value) | OR (p-value) |
| **Intercept** | -2.42 | -2.39 | -2.52 | -1.96 | -2.57 | -2.56 | -2.71 | -1.96 | -2.24 | -2.37 |
| **Age group** |  |  |  |  |  |  |  |  |  |  |
| 14 to 29 years | Ref |  | Ref |  |  |  |  |  |  |  |
| 30 to 44 years | 0.93 |  | 1.44 |  |  |  |  |  |  |  |
| 45 to 59 years | 0.81 |  | 1.31 |  |  |  |  |  |  |  |
| More than 59 years | 0.52 |  | 1.31 |  |  |  |  |  |  |  |
| **Gender** |  |  |  |  |  |  |  |  |  |  |
| Female |  |  | Ref | Ref |  |  |  |  |  |  |
| Male |  |  | 0.92 | 0.86 |  |  |  |  |  |  |
| **Form of payment** |  |  |  |  |  |  |  |  |  |  |
| Health insurance | Ref | Ref | Ref |  | Ref |  |  |  |  |  |
| Self-pay | 1.60 | 1.00 | 1.11 |  | 1.22 |  |  |  |  |  |
| **Lead time** |  |  |  |  |  |  |  |  |  |  |
| 0 to 7 days | Ref | Ref | Ref | Ref | Ref | Ref |  |  |  | Ref |
| 8 to 15 days | 1.69**** | 1.21 | 1.37 | 1.01 | 1.92*** | 1.76**** |  |  |  | 1.93*** |
| 16 to 29 days | 1.85**** | 1.18 | 1.16 | 1.47 | 1.51 | 1.84**** |  |  |  | 1.48 |
| More than 29 days | 1.65 | 1.07 | 1.36 | 1.90 | 1.90*** | 1.63 |  |  |  | 1.84*** |
| **Appointment time** |  |  |  |  |  |  |  |  |  |  |
| 08:30am to 10:30am | Ref | Ref | Ref | Ref | Ref | Ref | Ref |  |  |  |
| 10:31am to 12:30pm | 0.68 | 1.04 | 1.10 | 0.91 | 1.16 | 0.68 | 1.03 |  |  |  |
| 12:31pm to 2:30pm | 1.08 | 0.95 | 1.00 | 0.60 | 0.94 | 1.23 | 0.94 |  |  |  |
| 2:31pm to 4:30pm | 0.85 | 0.89 | 1.30 | 1.04 | 0.85 | 0.90 | 0.88 |  |  |  |
| 4:31pm to 6:30pm | 3.45**** | 1.98*** | 1.54 | 0.40 | 1.07 | 3.61**** | 1.92*** |  |  |  |
| **Prior no-show history** |  |  |  |  |  |  |  |  |  |  |
| 0 to 10% | Ref | Ref | Ref | Ref | Ref | Ref | Ref | Ref | Ref | Ref |
| 10 to 30% | 1.47*** | 1.88*** | 1.61*** | 1.38 | 1.31 | 1.39*** | 1.91**** | 1.62*** | 1.23 | 1.33 |
| 30 to 50% | 1.43 | 4.37*** | 3.31**** | 2.76**** | 2.22*** | 1.37 | 4.34**** | 3.42**** | 2.55**** | 2.22*** |
| More than 50% | 2.28**** | 14.49*** | 8.52**** | 2.05*** | 4.66**** | 2.45**** | 14.65**** | 8.42**** | 2.13**** | 4.69**** |
| **Number of previous appointments** |  |  |  |  |  |  |  |  |  |  |
| 1 or 2 times | Ref | Ref | Ref | Ref |  |  | Ref | Ref |  |  |
| 3 to 9 times | 1.13 | 0.63*** | 0.61*** | 0.90 |  |  | 0.65*** | 0.62*** |  |  |
| More than 9 times | 0.71 | 0.64 | 0.57*** | 0.71 |  |  | 0.66 | 0.58*** |  |  |
| **Type of appointment** |  |  |  |  |  |  |  |  |  |  |
| Pre-Surgery |  | Ref | Ref | Ref | Ref |  | Ref | Ref | Ref | Ref |
| Post-Surgery |  | 2.05**** | 1.53*** | 1.69*** | 1.61*** |  | 2.07**** | 1.52*** | 2.13*** | 1.55*** |
| **Appointment weekday** |  |  |  |  |  |  |  |  |  |  |
| Monday | Ref | Ref | Ref | Ref |  |  |  | Ref | Ref |  |
| Tuesday | 1.37 | 0.99 | 0.68 | 1.63 |  |  |  | 0.73 | 2.09**** |  |
| Wednesday | 0.99 | 0.73 | 0.87 | 1.03 |  |  |  | 0.87 | 0.98 |  |
| Thursday | 1.13 | 0.98 | 1.24 | 1.70*** |  |  |  | 1.15 | 2.02*** |  |
| Friday | 1.30 | 0.82 | 0.60*** | 0.65 |  |  |  | 0.59*** | 0.60 |  |
| **Distance** |  |  |  |  |  |  |  |  |  |  |
| Less than 10km | Ref |  | Ref |  | Ref | Ref |  |  |  |  |
| 10 to 20km | 0.56*** |  | 0.87 |  | 1.02 | 0.57*** |  |  |  |  |
| 20 to 50km | 1.25 |  | 1.01 |  | 1.05 | 1.25 |  |  |  |  |
| More than 50km | 1.34 |  | 0.84 |  | 0.66 | 1.37 |  |  |  |  |
| **Appointment Month** |  |  |  |  |  |  |  |  |  |  |
| Dec-Jan-Feb | Ref | Ref | Ref |  | Ref | Ref |  | Ref |  |  |
| Mar-Apr-May | 1.44*** | 1.40 | 0.95 |  | 1.06 | 1.43*** |  | 0.94 |  |  |
| Jun-Jul-Aug | 1.08 | 1.33 | 1.53*** |  | 1.13 | 1.06 |  | 1.58*** |  |  |
| Sep-Oct-Nov | 1.47*** | 1.35 | 1.97**** |  | 1.20 | 1.44 |  | 2.01***** |  |  |
| Legend: **** p-value<0.001; *** p-value<0.05; Ref. = Reference level; OR = Odds Ratio. | | | | | | | | | |  |
